# Supplementary material for: Western boundary circulation and coastal sea-level variability in Northern Hemisphere oceans
Source: Copernicus journal article supplement (doi:10.5194/os-17-1449-2021), 2021-10-22
Supplement: Supplementary file 1 [file os-17-1449-2021-supplement.pdf]

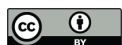

*Supplement of*

## **Western boundary circulation and coastal sea-level variability in Northern Hemisphere oceans**

**Samuel Tiéfolo Diabaté et al.**

*Correspondence to:* Samuel Tiéfolo Diabaté ([samuel.diabate.2020@mumail.ie](mailto:samuel.diabate.2020@mumail.ie))

The copyright of individual parts of the supplement might differ from the article licence.

**Table S1.** The Atlantic tide gauges used in the study, with their locations (approximate) and completeness before interpolation is applied. The angle used to rotate winds in an alongshore/across-shore coordinate system are also shown.

| No. | Station                       | PSMSL ID | Longitude (°E) | Latitude (°N) | Completeness <sup>a</sup> (%) | Angle <sup>b</sup> (°) |
|-----|-------------------------------|----------|----------------|---------------|-------------------------------|------------------------|
| 1   | Key West                      | 188      | -81.807        | 24.555        | 98.8                          | 0                      |
| 2   | Fernandina Beach              | 112      | -81.465        | 30.672        | 96.4                          | 111                    |
| 3   | Fort Pulaski                  | 395      | -80.902        | 32.033        | 98.6                          | 42                     |
| 4   | Charleston I                  | 234      | -79.925        | 32.782        | 100.0                         | 42                     |
| 5   | Wilmington                    | 396      | -77.953        | 34.227        | 98.3                          | 42                     |
| 6   | Sewells Point, Hampton Roads  | 299      | -76.330        | 36.947        | 100.0                         | 65                     |
| 7   | Washington DC                 | 360      | -77.022        | 38.873        | 97.9                          | 65                     |
| 8   | Solomon's Island (Biol. Lab.) | 412      | -76.452        | 38.317        | 95.7                          | 65                     |
| 9   | Annapolis (Naval Academy)     | 311      | -76.480        | 38.983        | 95.4                          | 65                     |
| 10  | Baltimore                     | 148      | -76.578        | 39.267        | 99.7                          | 65                     |
| 11  | Lewes (Breakwater Harbor)     | 224      | -75.120        | 38.782        | 95.7                          | 65                     |
| 12  | Philadelphia (Pier 9N)        | 135      | -75.142        | 39.933        | 97.7                          | 65                     |
| 13  | Atlantic City                 | 180      | -74.418        | 39.355        | 92.6                          | 65                     |
| 14  | Sandy Hook                    | 366      | -74.008        | 40.467        | 98.5                          | 65                     |
| 15  | New York (The Battery)        | 12       | -74.013        | 40.700        | 98.8                          | 65                     |
| 16  | Montauk                       | 519      | -71.960        | 41.048        | 92.0                          | 65                     |
| 17  | New London                    | 429      | -72.090        | 41.360        | 96.2                          | 65                     |
| 18  | Newport                       | 351      | -71.327        | 41.505        | 98.7                          | 65                     |
| 19  | Woods Hole (Ocean. Inst.)     | 367      | -70.672        | 41.523        | 93.6                          | 65                     |
| 20  | Boston                        | 235      | -71.053        | 42.353        | 98.7                          | 21                     |
| 21  | Portland (Maine)              | 183      | -70.247        | 43.657        | 99.7                          | 21                     |
| 22  | Eastport                      | 332      | -66.982        | 44.903        | 92.2                          | 21                     |

<sup>a</sup>Completeness is computed over the period 1948 – 2019 for the Atlantic gauges.

<sup>b</sup>Coastline angles are approximate and measured counterclockwise from east.

**Table S2.** Same as the previous table, but for the Pacific set of tide gauges.

| No. | Station                | PSMSL ID | Longitude (°E) | Latitude (°N) | Completeness <sup>a</sup> (%) | Angle <sup>b</sup> (°) |
|-----|------------------------|----------|----------------|---------------|-------------------------------|------------------------|
| 1   | Odomari                | 1097     | 130.689        | 31.024        | 99.2                          | 85                     |
| 2   | Aburatsu               | 814      | 131.409        | 31.577        | 100.0                         | 85                     |
| 3   | Hosojima               | 133      | 131.669        | 32.429        | 96.5                          | 85                     |
| 4   | Tokuyama II            | 1210     | 131.803        | 34.041        | 100.0                         | 19                     |
| 5   | Tosa Shimizu           | 815      | 132.959        | 32.779        | 100.0                         | 19                     |
| 6   | Matsuyama II           | 1062     | 132.712        | 33.859        | 98.4                          | 19                     |
| 7   | Hirosima               | 1028     | 132.465        | 34.353        | 98.7                          | 19                     |
| 8   | Kure IV                | 1209     | 132.550        | 34.241        | 99.0                          | 19                     |
| 9   | Uno                    | 812      | 133.949        | 34.489        | 96.6                          | 19                     |
| 10  | Komatsushima           | 809      | 134.588        | 34.009        | 98.7                          | 19                     |
| 11  | Sumoto                 | 1098     | 134.907        | 34.341        | 98.9                          | 19                     |
| 12  | Shirahama              | 1150     | 135.375        | 33.684        | 98.9                          | 19                     |
| 13  | Kainan                 | 701      | 135.191        | 34.144        | 99.0                          | 19                     |
| 14  | Wakayama               | 816      | 135.146        | 34.222        | 99.8                          | 19                     |
| 15  | Tan-Nowa               | 817      | 135.178        | 34.339        | 97.9                          | 19                     |
| 16  | Kushimoto              | 134      | 135.773        | 33.476        | 98.6                          | 19                     |
| 17  | Uragami                | 1090     | 135.896        | 33.558        | 96.2                          | 19                     |
| 18  | Owase                  | 1146     | 136.207        | 34.076        | 93.9                          | 19                     |
| 19  | Shimizu-Minato         | 808      | 138.518        | 35.012        | 99.7                          | 19                     |
| 20  | Uchiura                | 407      | 138.890        | 35.017        | 99.0                          | 19                     |
| 21  | Okada                  | 1091     | 139.391        | 34.789        | 99.2                          | 19                     |
| 22  | Aburatsubo             | 130      | 139.615        | 35.160        | 99.0                          | 19                     |
| 23  | Yokosuka               | 722      | 139.651        | 35.288        | 99.5                          | 19                     |
| 24  | Katsuura               | 1191     | 140.249        | 35.129        | 97.9                          | 19                     |
| 25  | Onahama <sup>c</sup>   | 635      | 140.892        | 36.938        | 99.7                          | 100                    |
| 26  | Ayukawa <sup>c</sup>   | 131      | 141.505        | 38.297        | 98.4                          | 100                    |
| 27  | Asamushi               | 721      | 140.859        | 40.898        | 98.9                          | 100                    |
| 28  | Miyako II <sup>c</sup> | 1149     | 141.975        | 39.643        | 99.8                          | 100                    |
| 29  | Hakodate I             | 813      | 140.725        | 41.782        | 99.5                          | 100                    |
| 30  | Kushiro                | 518      | 144.371        | 42.976        | 99.5                          | 20                     |

<sup>a</sup>Completeness is computed over the period 1968 – 2019 for the Pacific gauges.

<sup>b</sup>Coastline angles are approximate and measured counterclockwise from east.

<sup>c</sup> Timeseries that were filled with SSH from 2011 onwards.

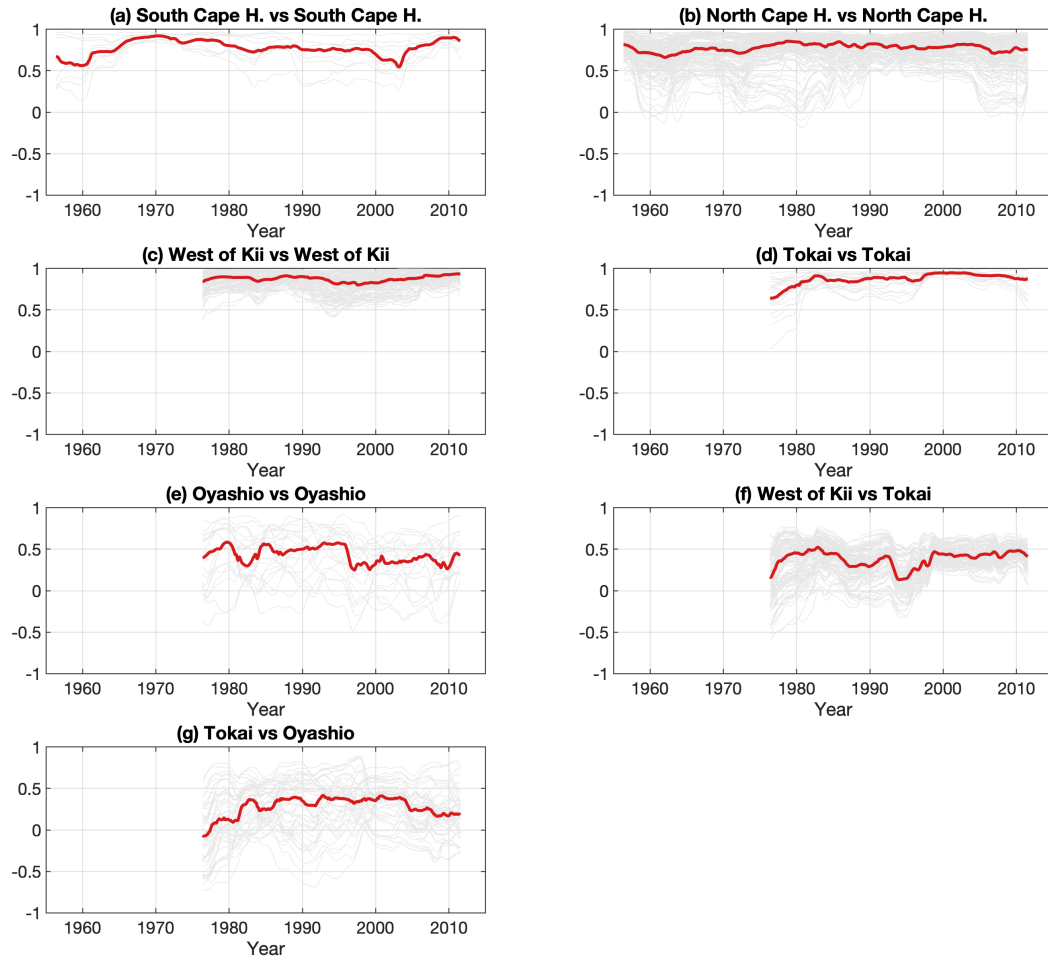

**Figure S1.** Moving correlation analysis between the tide gauges records with a running window of 15 years. Each individual grey line renders the moving correlation between two records. The x-axis represents the center of the moving window. (a) Cross-correlation between gauges located south of Cape Hatteras. (b, c, d, and e) as in (a), but for gauges north of Cape Hatteras (b), west of Kii (c), south of Tōkai (d), and (e) east of Honshū–Hokkaidō (*i.e.*, the Oyashio group) respectively. (f) Cross-correlation uniquely between gauges on either side of the Kii peninsula (west of Kii versus south of Tōkai). (g) as (f), but for the groupings south of Tōkai and the Oyashio group. On each panel, the solid thick red line is the median of the individual cross-correlations.

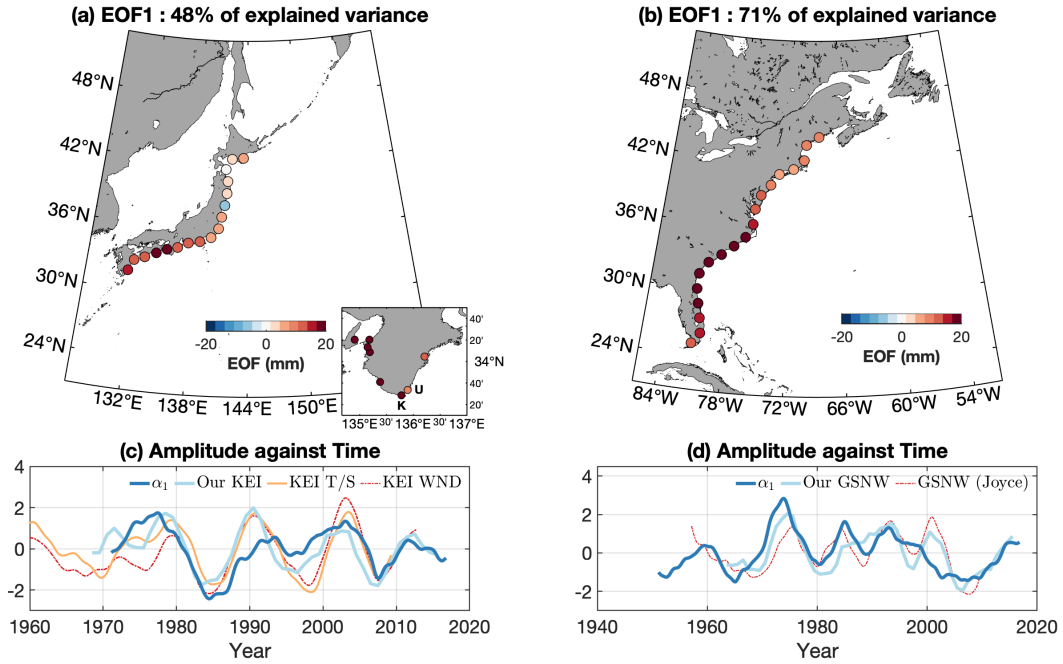

**Figure S2.** (a) and (b) present the leading EOF ( $\phi_1$ ) of the 73-months filtered sea-level anomaly obtained with the Pacific gauges and the Atlantic gauges respectively (circular markers). (c) and (d) present, for the Pacific and Atlantic respectively, the associated principal components  $\alpha_1$  (solid blue lines), together with indices of extension meridional location: this study and Qiu et al. (2016) T/S-based and wind-based KEIs (on (c), thick light blue line, orange solid line and dot-dashed red line respectively); and this study and Joyce et al. (2000) GSNWs (on (d), thick light blue line and dot-dashed red line, respectively). All quantities on (c) and (d) are normalized. On (c), it is apparent that the variations of  $\alpha_1$  between 1998 and 2005 are now joined into one single lobe due to the filtering. The inset on (a) present the regression coefficient obtained when the principal component is regressed on the original tide gauges, with a zoom in on the Kii peninsula.

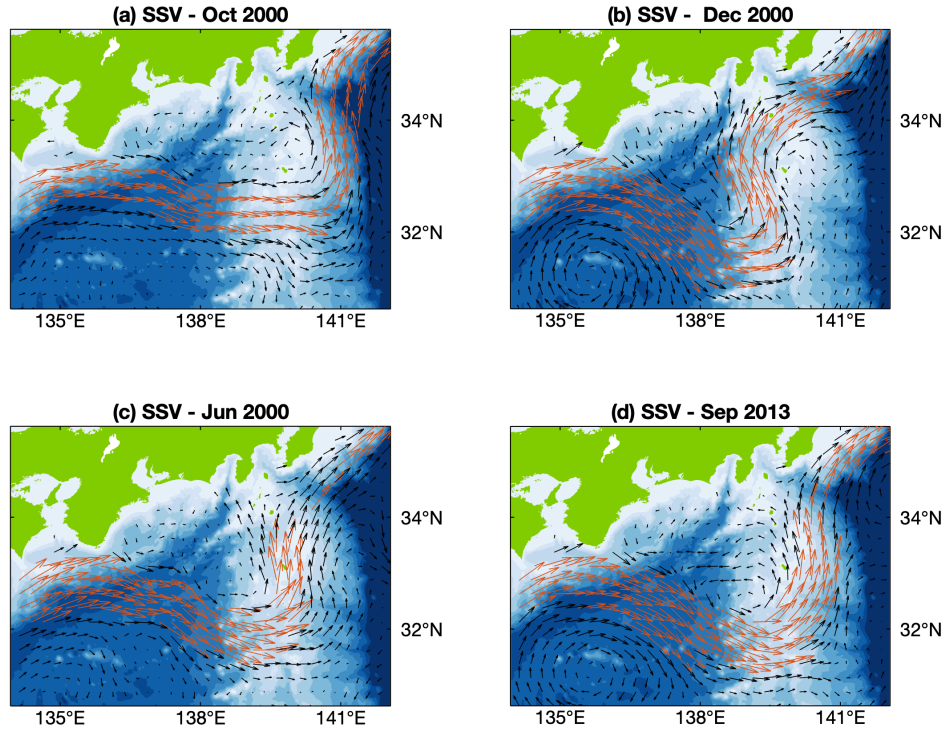

**Figure S3.** Situation during the two recent periods of strong positive  $\alpha_2$  that are not concurrent to tLM: April 2000 to April 2001, and the second half of 2013. (a), (b) (c) and (d) are snapshot of the velocities for December 2000, October 2000, June 2000 and September 2013, respectively. Between April 2000 and April 2001, the Kuroshio alternated between unusual offshore NLM similar to the October 2000 snapshot presented on (a), non-persistent typical LM of one or two months lifetime, as on (b), and situations somewhat in between where the Kuroshio follows the ridge, as on (c). Large velocity vectors (in orange) were clipped to highlight the westward current nearshore in the area 137°E – 140°E, 33°N – 34.5°N. For this particular panel SSV were not 19-months filtered.

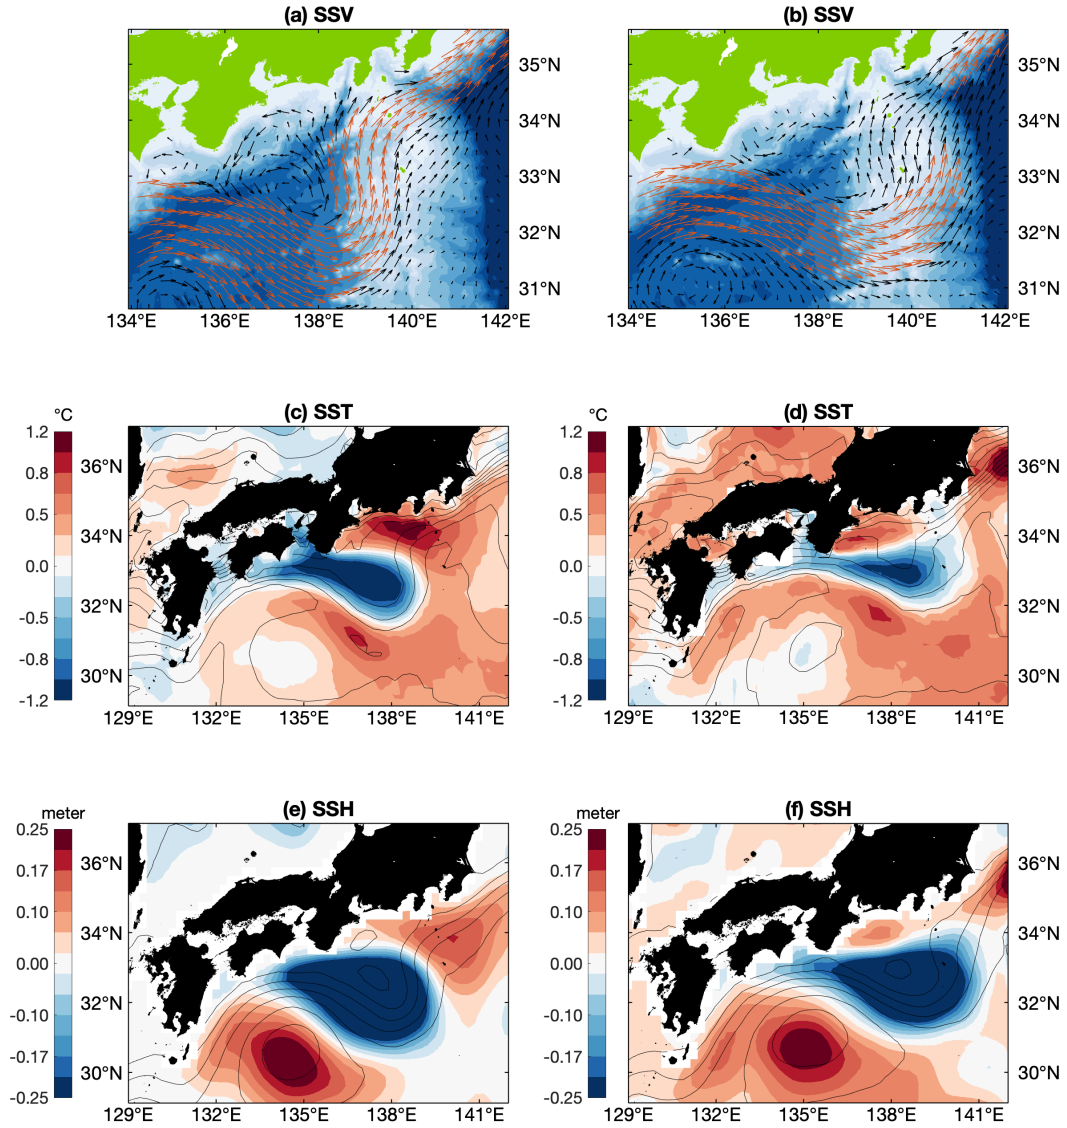

**Figure S4.** (a) SST, (c) SSH and (e) surface velocities averaged over the period of typical large meander during the satellite era (JMA, 2018). Black contours represent the average over the large meander periods and shadings the deviation from the 1993–2020 mean. Akin figures can be found in Sugimoto et al. (2019) (a and c), and Usui et al. (2013) (e). (b – f) are similar to (a – e), but averaged over April 2000 – April 2001 rather than over typical large meander periods. In (a) and (b), large velocity vectors (in orange) were clipped to highlight the westward current nearshore in the area 137°E – 140°E, 33°N – 34.5°N. For this particular panel, SST, SSV and SSH were not 19-months filtered.

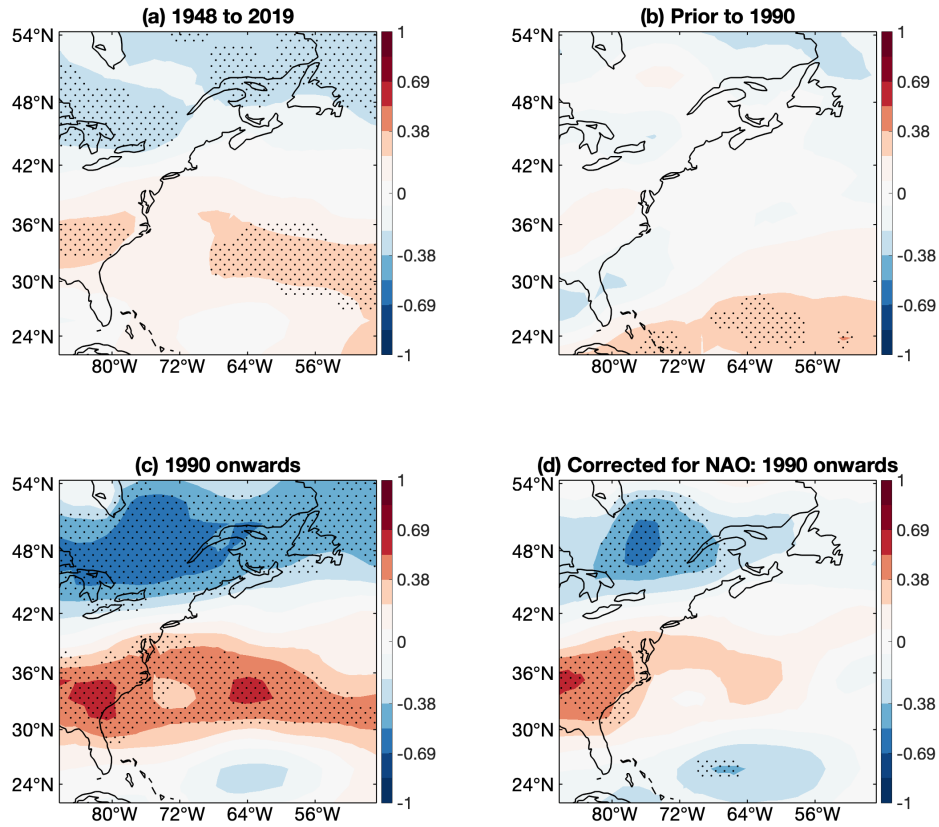

**Figure S5.** Correlation between the wind stress projected onto a  $20^\circ$  from zonal angle and the principal component  $\alpha_2$ , on the period (a) 1948 – 2019, (b) 1948 – 1989 and (c) 1990 – 2019. (d) shows the correlation for the period 1990 – 2019 corrected for the NAO variations (the so-called partial correlation). The monthly NAO is used instead of DJFM NAO, for compatibility with winds and  $\alpha_2$ . Dotted areas represent significant correlations at 5% significance level.



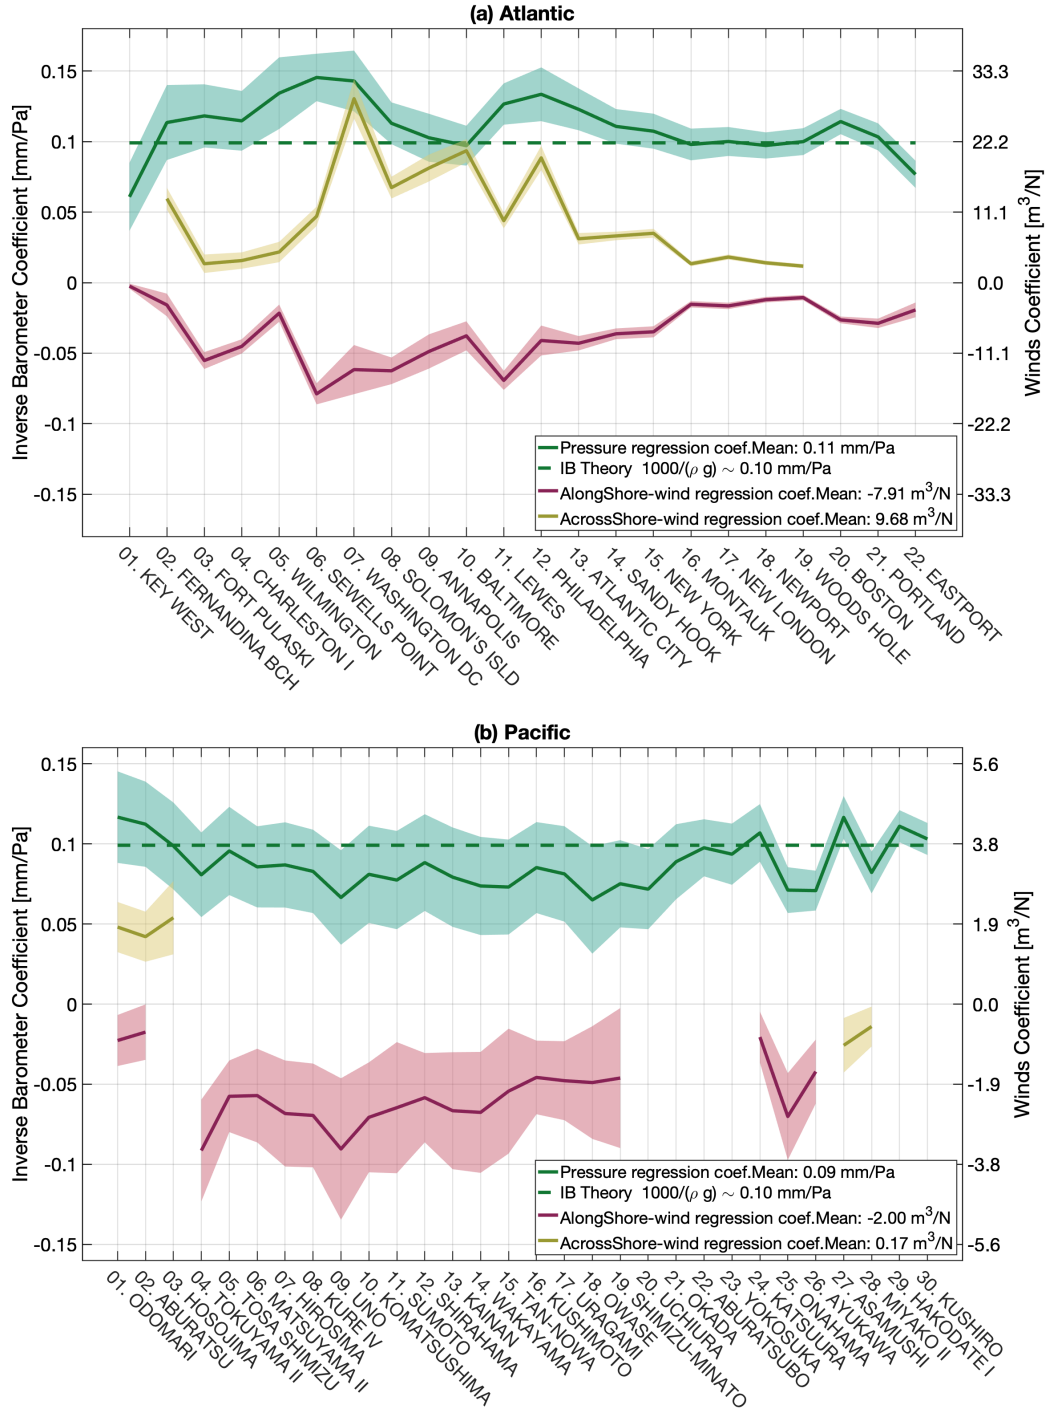

**Figure S6.** Regression coefficients of the pressure (solid green line) and alongshore and across-shore windstress (respectively red and yellow lines) obtained for (a) Atlantic and (b) Pacific gauges. Shadings indicate the confidence intervals. For each tide gauge, only the regression coefficients of the best subset regression are shown. The expected inverse barometer response is, in theory,  $(\rho g)^{-1} \sim 0.10 \text{ mm/Pa}$  and is also shown (dashed dark green line). Note that for the tide gauge of Key West, the windstress is not rotated,  $\phi = 0$ :  $\tau_u$  and  $\tau_v$  are used as regressors.

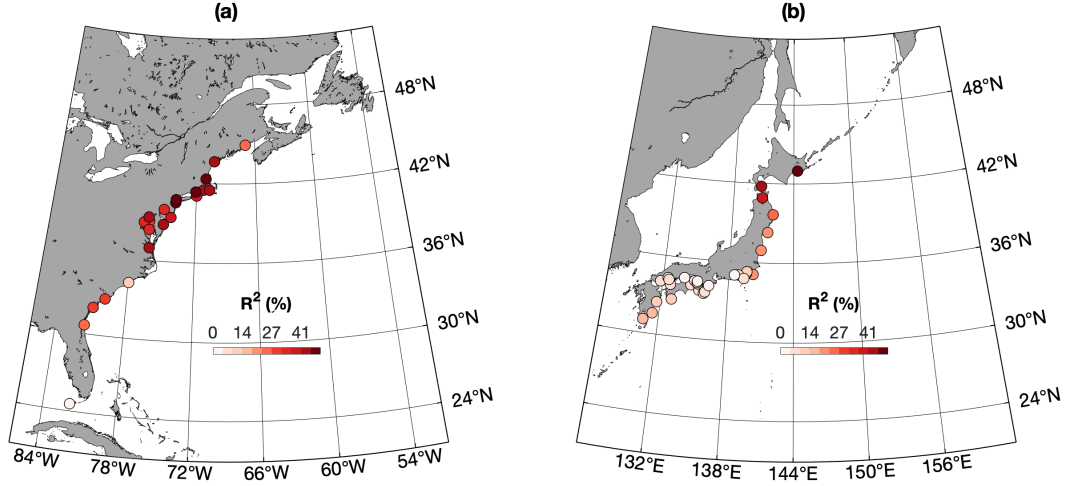

**Figure S7.** The adjusted coefficient of determination  $R^2_{Adj}$  obtained for the (a) Atlantic and (b) Pacific gauges. This quantity indicates how much does the best subset regression explain of the monthly sea level.

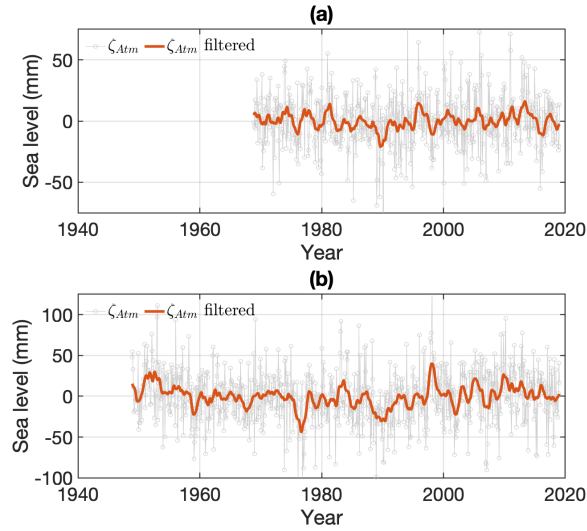

**Figure S8.** Average over the stations (a) east of Honshū–Hokkaidō (*i.e.*, the Oyashio group in the Pacific) and (b) north of Cape Hatteras (Atlantic) of the component  $\zeta_{Atm}$  that is removed from the tide gauge records to correct for local atmospheric forcing. Thick orange line is  $\zeta_{Atm}$  after a 19-months filter is applied.
